# Supplementary material
Source: publisher site journal article supplement (https://www.spandidos-publications.com/2100/downloadSupplementary)

Figure S1. Spectra of chromatogram of the extracted compounds. Total ion current chromatogram of the vegetable matrix of the extracted compound used in the present study (first row) and extracted ion chromatograms for pseudomolecular ions corresponding to di-, tri-, tetra- and penta-galloyl hexoses. The y-axis indicates the percentage of the relative ion abundance of each molecule compared to the pure analytical standards. Bold numbers refer to peak number. MW, molecular weight.

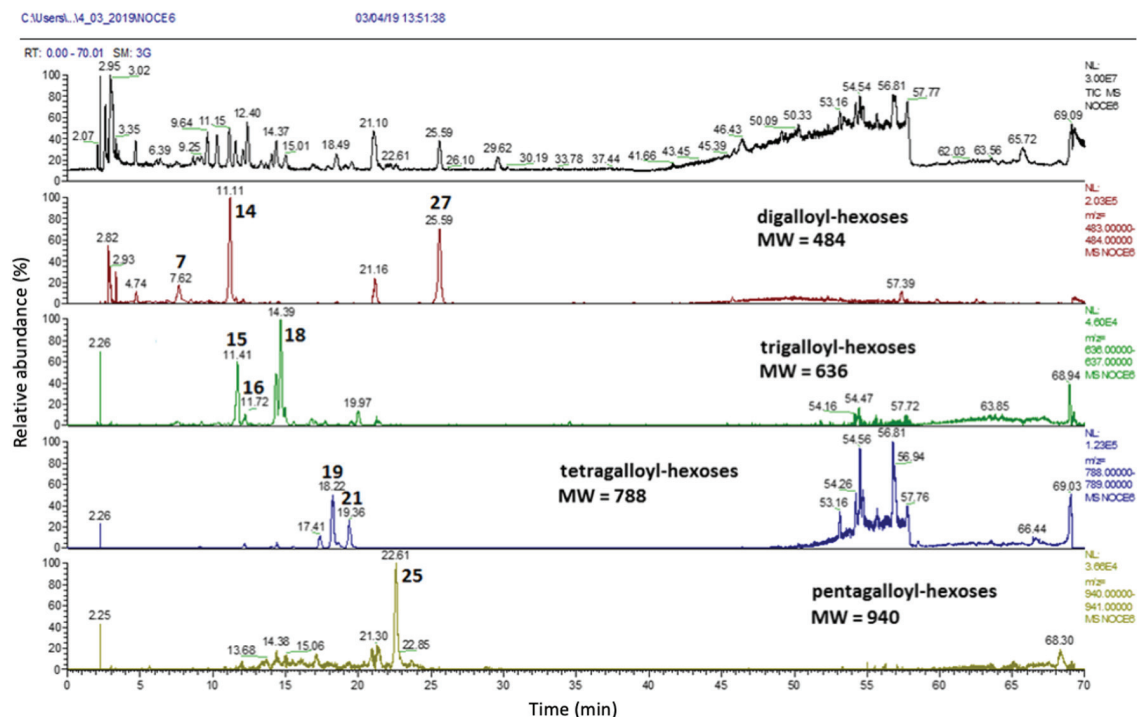

Figure S2. Ultra-violet visible spectra of peaks (A) 20 (ellagic acid hexoside isomer 1), (B) 22 (ellagic acid hexoside isomer 2), (C) 28 (ellagic acid pentoside) and (D) 29 (valoneic acid dilactone derivative).

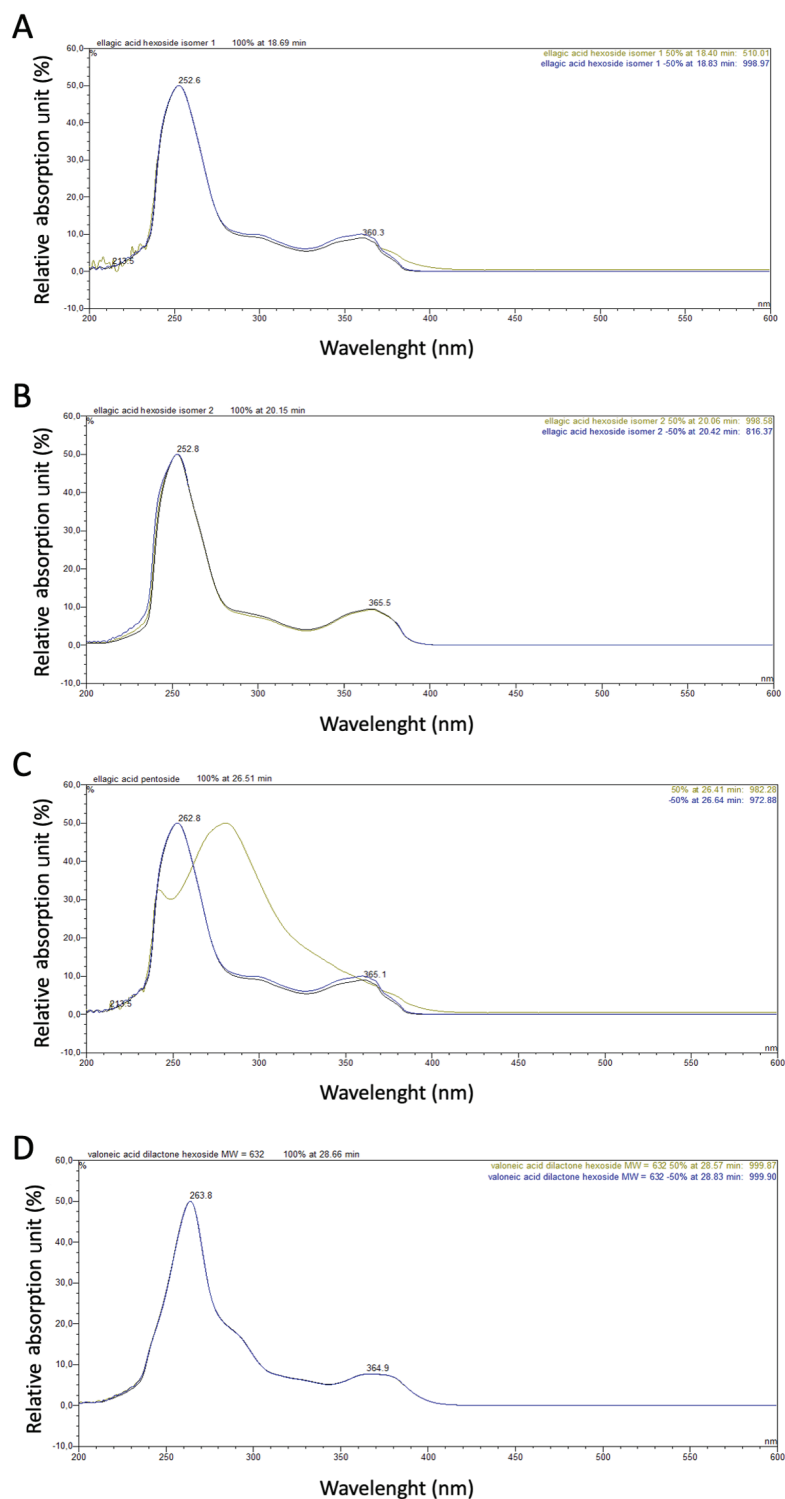

Supplement: Supplementary file 1 [file downloadSupplementary]
